# Supplementary material for: Proteomic profiling of serum identifies a molecular signature that correlates with clinical outcomes in COPD
Source: PubMed Central journal article supplement (PMC9731494; doi:10.1371/journal.pone.0277357), 2022-12-08
Supplement: pone.0277357.s002.pdf [file pone.0277357.s002.pdf]

## Supporting information

**S1 Table: characteristics of COPD patients of the COBRA cohort**

| Parameter                                                  | n * | All patients (n = 241) |     | Patients with 1 visit (n=78) |     | Patients with 2 visits (n = 163) |                    | p value <sup>a</sup> | p value <sup>b</sup> |  |
|------------------------------------------------------------|-----|------------------------|-----|------------------------------|-----|----------------------------------|--------------------|----------------------|----------------------|--|
|                                                            |     | Visit 1                | n * | Visit 1 only                 | n * | Visit 1                          | Visit 2            |                      |                      |  |
| Male sex – no. (%)                                         | 241 | 164 (68.1)             | 78  | 50 (64.1)                    | 163 | 114 (69.9)                       | -                  | 0.37                 | -                    |  |
| Age (years)                                                | 241 | 63.1 ± 9.8             | 78  | 61.6 ± 11.4                  | 163 | 63.8 ± 8.9                       | 64.5 ± 9.0         | 0.14                 | -                    |  |
| Caucasian origin – no. (%)                                 | 239 | 224 (93.7)             | 76  | 70 (92.1)                    | 163 | 154 (94.5)                       | -                  | 0.49                 | -                    |  |
| Other origin – no. (%)                                     | 239 | 15 (6.3)               | 76  | 6 (7.9)                      | 163 | 9 (5.5)                          | -                  | 0.49                 | -                    |  |
| <i>GOLD stages</i>                                         |     |                        |     |                              |     |                                  |                    |                      |                      |  |
| GOLD I – no. (%)                                           | 238 | 54 (22.7)              | 75  | 24 (32.0)                    | 159 | 28 (17.6)                        | 28 (17.6)          | <b>0.03</b>          | 0.99                 |  |
| GOLD II – no. (%)                                          | 238 | 87 (36.5)              | 75  | 20 (26.6)                    | 159 | 66 (41.5)                        | 66 (41.5)          | <b>0.03</b>          | 0.99                 |  |
| GOLD III – no. (%)                                         | 238 | 53 (22.3)              | 75  | 14 (18.7)                    | 159 | 38 (23.9)                        | 36 (22.7)          | <b>0.03</b>          | 0.99                 |  |
| GOLD IV – no. (%)                                          | 238 | 44 (18.5)              | 75  | 17 (22.7)                    | 159 | 27 (17.0)                        | 29 (18.2)          | <b>0.03</b>          | 0.99                 |  |
| <i>Smoking history</i>                                     |     |                        |     |                              |     |                                  |                    |                      |                      |  |
| Former smoker – no. (%)                                    | 241 | 149 (61.8)             | 78  | 41 (52.6)                    | 163 | 108 (66.3)                       | 108 (66.3)         | <b>0.002</b>         | 1.00                 |  |
| Packs per year in former smokers – no.                     | 147 | 49.1 ± 23.9            | 39  | 49.7 ± 22.2                  | 101 | 49.7 ± 25.1                      | 49.9 ± 25.1        | 0.99                 | 0.96                 |  |
| Active smokers – no. (%)                                   | 241 | 84 (34.9)              | 78  | 30 (38.5)                    | 163 | 54 (33.1)                        | 54 (33.1)          | <b>0.002</b>         | 1.00                 |  |
| Packs per year in active smokers – no.                     | 82  | 35.8 ± 21.7            | 28  | 35.1 ± 20.8                  | 47  | 36.0 ± 23.8                      | 34.9 ± 21.9        | 0.89                 | 0.83                 |  |
| Body Mass Index (kg per m <sup>2</sup> )                   | 240 | 26.5 ± 6.1             | 77  | 25.7 ± 5.9                   | 163 | 26.8 ± 6.2                       | -                  | 0.21                 | -                    |  |
| <i>Biology</i>                                             |     |                        |     |                              |     |                                  |                    |                      |                      |  |
| Blood leukocytes (no. per mm <sup>3</sup> )                | 165 | 7500 (6500 - 8900)     | 43  | 7400 (6400 - 10000)          | 96  | 7350 (6500 - 8750)               | 7100 (6150 - 8150) | 0.37                 | 0.34                 |  |
| Blood eosinophils (no. per mm <sup>3</sup> )               | 165 | 162 (104 - 230)        | 43  | 146 (94 - 213)               | 96  | 165 (103 - 225)                  | 162 (117 - 244)    | 0.37                 | 0.67                 |  |
| With blood eosinophils ≥ 300 per mm <sup>3</sup> – no. (%) | 165 | 27 (16.4)              | 43  | 4 (9.3)                      | 96  | 17 (17.7)                        | 12 (12.5)          | 0.21                 | 0.32                 |  |
| Blood neutrophils (no. per mm <sup>3</sup> )               | 163 | 4752 (3840 - 5950)     | 42  | 4479 (3782 - 6486)           | 95  | 4680 (3835 - 5950)               | 4560 (3843 - 5265) | 0.74                 | 0.39                 |  |
| Blood lymphocytes (no. per mm <sup>3</sup> )               | 165 | 1830 (1406 - 2280)     | 43  | 1920 (1539 - 2438)           | 96  | 1648 (1302 - 2190)               | 1782 (1387 - 2184) | <b>0.04</b>          | 0.49                 |  |
| Blood monocytes (no. per mm <sup>3</sup> )                 | 161 | 560 (444 - 720)        | 40  | 603 (469 - 740)              | 96  | 532 (404 - 698)                  | 555 (463 - 667)    | <b>0.03</b>          | 0.25                 |  |
| Hemoglobin – g per deciliter                               | 115 | 14.4 ± 1.4             | 32  | 14.1 ± 1.6                   | 72  | 14.6 ± 1.3                       | 14.3 ± 1.4         | 0.10                 | 0.25                 |  |
| CRP – mg per Liter                                         | 112 | 7.6 ± 7.6              | 22  | 6.5 ± 4.6                    | 73  | 7.8 ± 8.1                        | 6.8 ± 7.5          | 0.35                 | 0.47                 |  |
| With CRP ≥ 3 mg per Liter – no. (%)                        | 112 | 85 (75.9)              | 22  | 17 (77.3)                    | 73  | 54 (74.0)                        | 54 (74.0)          | 0.76                 | 1.00                 |  |
| <i>Blood gases</i>                                         |     |                        |     |                              |     |                                  |                    |                      |                      |  |
| PaO <sub>2</sub> - mmHg                                    | 181 | 74.5 ± 14.1            | 57  | 74.8 ± 14.2                  | 91  | 72.9 ± 13.7                      | 74.7 ± 13.2        | 0.42                 | 0.37                 |  |
| PaCO <sub>2</sub> . mmHg                                   | 182 | 39.6 ± 4.8             | 57  | 40.0 ± 4.8                   | 90  | 39.8 ± 4.9                       | 40.0 ± 6.0         | 0.86                 | 0.86                 |  |
| pH                                                         | 182 | 7.42 ± 0.03            | 57  | 7.41 ± 0.03                  | 92  | 7.41 ± 0.03                      | 7.41 ± 0.04        | 0.78                 | 0.70                 |  |

**S1 Table (continued)**

| <i>Respiratory function</i>                                |     |              |    |              |     |              |              |                    |              |
|------------------------------------------------------------|-----|--------------|----|--------------|-----|--------------|--------------|--------------------|--------------|
| Pre-bronchodilator FEV <sub>1</sub> (% predicted)          | 233 | 59.6 ± 24.3  | 72 | 63.0 ± 27.7  | 144 | 56.6 ± 21.7  | 56.1 ± 21.7  | 0.10               | 0.84         |
| Post-bronchodilator FEV <sub>1</sub> (% predicted)         | 171 | 63.7 ± 25.8  | 53 | 71.3 ± 30.4  | 70  | 56.6 ± 22.8  | 56.5 ± 21.5  | <b>0.005</b>       | 0.98         |
| With fixed airflow obstruction – no. (%) <sup>c</sup>      | 176 | 143 (81.3)   | 55 | 34 (61.8)    | 70  | 65 (92.9)    | 65 (92.9)    | <b>&lt; 0.0001</b> | 1.00         |
| Pre-bronchodilator FVC (% predicted)                       | 233 | 86.6 ± 21.3  | 73 | 86.1 ± 21.9  | 142 | 85.0 ± 20.4  | 84.0 ± 20.4  | 0.73               | 0.68         |
| Post-bronchodilator FVC (% predicted)                      | 169 | 91.5 ± 21.1  | 51 | 91.9 ± 21.5  | 69  | 91.0 ± 20.4  | 88.8 ± 21.1  | 0.83               | 0.54         |
| Pre-bronchodilator FEV <sub>1</sub> / FVC (% predicted)    | 235 | 53.5 ± 15.3  | 74 | 57.0 ± 16.7  | 144 | 51.4 ± 14.0  | 51.7 ± 14.2  | <b>0.01</b>        | 0.89         |
| Post-bronchodilator FEV <sub>1</sub> / FVC (% predicted)   | 176 | 53.9 ± 16.2  | 55 | 60.6 ± 17.3  | 70  | 47.2 ± 14.4  | 48.4 ± 14.7  | <b>&lt; 0.0001</b> | 0.62         |
| FRC - %                                                    | 124 | 137.8 ± 38.3 | 49 | 131.5 ± 31.7 | 37  | 140.9 ± 43.4 | 139.9 ± 41.5 | 0.27               | 0.92         |
| RV - %                                                     | 135 | 156.4 ± 53.0 | 53 | 150.7 ± 43.1 | 41  | 165.9 ± 62.9 | 154.7 ± 56.6 | 0.19               | 0.41         |
| TLC - %                                                    | 137 | 113.8 ± 19.2 | 55 | 112.0 ± 16.9 | 42  | 114.1 ± 21.7 | 112.4 ± 19.5 | 0.60               | 0.70         |
| DLCO - %                                                   | 115 | 59.0 ± 21.7  | 46 | 63.9 ± 21.6  | 34  | 49.5 ± 18.8  | 49.9 ± 18.8  | <b>0.003</b>       | 0.94         |
| <i>Symptoms</i>                                            |     |              |    |              |     |              |              |                    |              |
| With cough – no. (%)                                       | 241 | 97 (40.2)    | 78 | 27 (34.6)    | 163 | 70 (42.9)    | 56 (34.4)    | 0.22               | 0.12         |
| With wheezing – no. (%)                                    | 241 | 32 (13.3)    | 78 | 14 (17.9)    | 163 | 18 (11.0)    | 16 (9.8)     | 0.14               | 0.72         |
| With emphysema no. (%) <sup>d</sup>                        | 241 | 92 (38.2)    | 78 | 28 (35.9)    | 163 | 64 (39.3)    | 64 (39.3)    | 0.62               | 1.00         |
| With exacerbations in the previous 12 months - no. (%)     | 241 | 128 (53.1)   | 78 | 39 (50.0)    | 163 | 89 (54.6)    | 62 (38.0)    | 0.51               | <b>0.003</b> |
| Exacerbations in the previous 12 months - no.              | 241 | 1.44 ± 0.16  | 78 | 1.26 ± 0.22  | 163 | 1.52 ± 0.21  | 1.46 ± 0.23  | 0.12               | 0.72         |
| Unscheduled medical visits in the previous 12 months - no. | 241 | 1.19 ± 0.17  | 78 | 0.96 ± 0.23  | 163 | 1.29 ± 0.22  | 1.08 ± 0.16  | <b>0.03</b>        | 0.09         |
| Hospitalizations for COPD in the previous 12 months – no.  | 241 | 0.32 ± 0.05  | 78 | 0.41 ± 0.11  | 163 | 0.27 ± 0.05  | 0.19 ± 0.06  | 0.10               | 0.17         |
| <i>Comorbidities</i>                                       |     |              |    |              |     |              |              |                    |              |
| Cardiovascular – no. (%)                                   | 241 | 103 (42.7)   | 78 | 32 (41.0)    | 163 | 71 (43.6)    | -            | 0.71               | -            |
| Hypertension – no. (%)                                     | 241 | 67 (27.8)    | 78 | 21 (26.9)    | 163 | 46 (28.2)    | -            | 0.84               | -            |
| Dyslipidemia – no. (%)                                     | 241 | 58 (24.1)    | 78 | 14 (17.9)    | 163 | 44 (27.0)    | -            | 0.13               | -            |
| Diabetes – no. (%)                                         | 241 | 28 (11.6)    | 78 | 7 (9.0)      | 163 | 21 (12.9)    | -            | 0.38               | -            |
| Sinusitis – no. (%)                                        | 241 | 27 (11.2)    | 78 | 7 (9.0)      | 163 | 20 (12.3)    | -            | 0.45               | -            |
| Allergic rhinitis – no. (%)                                | 241 | 38 (15.8)    | 78 | 12 (15.4)    | 163 | 26 (15.9)    | -            | 0.92               | -            |
| Obstructive sleep apnea – no. (%)                          | 241 | 22 (9.1)     | 78 | 4 (5.1)      | 163 | 18 (11.0)    | -            | 0.14               | -            |
| Gastro Esophageal Reflux – no. (%)                         | 241 | 70 (29.0)    | 78 | 21 (26.9)    | 163 | 49 (30.1)    | -            | 0.62               | -            |
| Bronchial dilatation – no. (%)                             | 241 | 11 (4.6)     | 78 | 3 (3.8)      | 163 | 8 (4.9)      | -            | 0.72               | -            |

**S1 Table (continued)**

| <i>Treatments</i>                                    |     |             |    |            |     |            |            |               |      |
|------------------------------------------------------|-----|-------------|----|------------|-----|------------|------------|---------------|------|
| On SABA – no. (%)                                    | 231 | 144 (62.3)  | 70 | 33 (47.1)  | 158 | 110 (69.6) | 115 (72.8) | <b>0.002</b>  | 0.54 |
| On LABA alone – no. (%)                              | 233 | 26 (11.2)   | 70 | 5 (7.1)    | 160 | 21 (13.1)  | 18 (11.2)  | 0.19          | 0.61 |
| On LAMA alone – no. (%)                              | 233 | 16 (6.9)    | 70 | 4 (5.7)    | 160 | 12 (7.5)   | 12 (7.5)   | 0.63          | 1.00 |
| On ICS alone – no. (%)                               | 233 | 4 (1.7)     | 70 | 1 (1.4)    | 160 | 3 (1.9)    | 3 (1.9)    | 0.82          | 1.00 |
| Daily dose of ICS - µg of equivalents beclomethasone | 119 | 1304 ± 669  | 28 | 1499 ± 811 | 77  | 1253 ± 633 | 1242 ± 626 | 0.11          | 0.92 |
| On OCS – no. (%)                                     | 232 | 8 (3.4)     | 69 | 7 (10.1)   | 160 | 1 (0.6)    | 2 (1.2)    | <b>0.0003</b> | 0.57 |
| Daily dose of prednisone (mg)                        | 8   | 20.4 ± 10.9 | 7  | 22.6 ± 9.6 | 1   | 5          | 5          | 0.14          | -    |
| On LABA + LAMA – no. (%)                             | 233 | 22 (9.4)    | 70 | 6 (8.6)    | 160 | 16 (10.0)  | 21 (13.1)  | 0.74          | 0.39 |
| On LABA + LAMA + ICS – no. (%)                       | 233 | 78 (33.5)   | 70 | 22 (31.4)  | 160 | 55 (34.4)  | 63 (39.4)  | 0.67          | 0.36 |
| On anti-histamine – no. (%)                          | 241 | 20 (8.3)    | 78 | 8 (10.3)   | 162 | 12 (7.4)   | 8 (4.9)    | 0.46          | 0.36 |
| On theophylline – no. (%)                            | 232 | 1 (0.4)     | 69 | 0 (0.0)    | 160 | 1 (0.6)    | 1 (0.6)    | 0.52          | 1.00 |
| On gastro esophageal reflux inhibitors – no. (%)     | 241 | 56 (23.2)   | 78 | 17 (21.8)  | 163 | 39 (23.9)  | 29 (17.8)  | 0.72          | 0.18 |
| On anti-hypertensive drugs – no. (%)                 | 232 | 80 (34.5)   | 70 | 24 (34.3)  | 160 | 55 (34.4)  | 54 (33.7)  | 0.99          | 0.91 |
| On statins – no. (%)                                 | 231 | 56 (24.2)   | 69 | 11 (15.9)  | 160 | 44 (27.5)  | 49 (30.6)  | 0.07          | 0.54 |
| On fibrates – no. (%)                                | 229 | 5 (2.2)     | 69 | 1 (1.4)    | 157 | 4 (2.5)    | 3 (1.9)    | 0.61          | 0.71 |
| On anti-platelet aggregation – no. (%)               | 231 | 63 (27.3)   | 69 | 15 (21.7)  | 159 | 47 (29.6)  | 42 (26.4)  | 0.23          | 0.54 |
| Other – no. (%)                                      | 227 | 102 (44.9)  | 68 | 20 (29.4)  | 157 | 81 (51.6)  | 75 (47.8)  | <b>0.003</b>  | 0.50 |
| On oxygen therapy – no. (%)                          | 238 | 37 (15.5)   | 75 | 11 (14.7)  | 161 | 26 (16.1)  | 16 (9.9)   | 0.78          | 0.10 |
| Adherence to treatments – no. (%)                    | 224 | 203 (90.6)  | 64 | 55 (85.9)  | 155 | 144 (92.9) | 143 (92.3) | 0.11          | 0.83 |

Data are n (%), or means ± SD, or median (25-75 IQR), or means ± SEM, in case of number of exacerbations, of unscheduled hospital visits and hospitalizations for COPD in the previous 6 months

CRP = C reactive protein; FEV<sub>1</sub> = Forced Expiratory Volume in 1 second; FVC = Forced Vital Capacity; FRC = Functional Residual Capacity; RV = Residual Volume; TLC = Total Lung Capacity; DLCO = transfer factor of the lung for carbon monoxide; ICS = inhaled corticosteroids; SABA = short-acting β<sub>2</sub>-agonists; LABA = long-acting β<sub>2</sub>-agonists; OCS = oral corticosteroids; LAMA = long-lasting muscarinic antagonists.

\* denotes the number of patients with each available variable

<sup>a</sup> p ≤ 0.05, between COPD patients with 1 and 2 visits (n=78 and n=163, respectively) (Students' t test, or Mann-Whitney U-test, or Fisher exact test, 2-tailed, or Poisson test).

<sup>b</sup> p ≤ 0.05, between visits 1 and 2 for n=163 COPD patients (Students' t test, or Mann-Whitney U-test, or Fisher exact test, 2-tailed, or Poisson test).
