# Supplementary material for: Proteomic profiling of serum identifies a molecular signature that correlates with clinical outcomes in COPD
Source: PubMed Central journal article supplement (PMC9731494; doi:10.1371/journal.pone.0277357), 2022-12-08
Supplement: pone.0277357.s003.pdf [file pone.0277357.s003.pdf]

## Supporting information

**S2 Table: characteristics of COPD patients of the MLCC cohort**

| Parameter                                                  | n * | All patients, n = 47 |
|------------------------------------------------------------|-----|----------------------|
| Male sex – no. (%)                                         | 47  | 29 (61.7)            |
| Age (years)                                                | 47  | 72.5 ± 9.6           |
| Caucasian origin – no. (%)                                 | 47  | 47 (100)             |
| Other origin – no. (%)                                     | 47  | 0                    |
| <i>GOLD stages</i>                                         |     |                      |
| GOLD 1 – no. (%)                                           | 47  | 2 (4.3)              |
| GOLD 2 – no. (%)                                           | 47  | 16 (34.0)            |
| GOLD 3 – no. (%)                                           | 47  | 19 (40.4)            |
| GOLD 4 – no. (%)                                           | 47  | 10 (21.3)            |
| <i>Smoking history</i>                                     |     |                      |
| Never smokers – no. (%)                                    | 47  | 0                    |
| Former smoker – no. (%)                                    | 47  | 41 (87.2)            |
| Packs per year in former smokers – no.                     | 47  | 56.9 ± 32.6          |
| Active smokers – no. (%)                                   | 47  | 6 (12.8)             |
| Packs per year in active smokers – no.                     | 47  | 89.2 ± 52.1          |
| Body Mass Index (kg per m <sup>2</sup> )                   | 31  | 25.2 ± 6.0           |
| <i>Biology</i>                                             |     |                      |
| Blood leukocytes (no. per mm <sup>3</sup> )                | 45  | 7800 (6500-9800)     |
| Blood eosinophils (no. per mm <sup>3</sup> )               | 45  | 200 (100-300)        |
| With blood eosinophils ≥ 300 per mm <sup>3</sup> – no. (%) | 45  | 14 (31.1)            |
| Blood neutrophils (no. per mm <sup>3</sup> )               | 45  | 5300 (4300-6400)     |
| Blood lymphocytes (no. per mm <sup>3</sup> )               | 45  | 1600 (1100-2000)     |
| Blood monocytes (no. per mm <sup>3</sup> )                 | 45  | 700 (600-800)        |
| Hemoglobin – g per deciliter                               | 45  | 13.1 ± 1.6           |
| CRP – mg per Liter                                         | 34  | 1.4 ± 2.9            |
| With CRP ≥ 3 mg per Liter – no. (%)                        | 34  | 2 (5.9)              |
| <i>Blood gases</i>                                         |     |                      |
| PaO <sub>2</sub> - mmHg                                    | 9   | 66.1 ± 5.4           |
| PaCO <sub>2</sub> - mmHg                                   | 9   | 40.5 ± 4.6           |
| <i>Respiratory function</i>                                |     |                      |
| Pre-bronchodilator FEV <sub>1</sub> (% predicted)          | 28  | 39.1 ± 10.5          |
| Post-bronchodilator FEV <sub>1</sub> (% predicted)         | 29  | 41.9 ± 14.2          |
| Pre-bronchodilator FVC (% predicted)                       | 28  | 87.1 ± 16.9          |
| Post-bronchodilator FVC (% predicted)                      | 30  | 93.1 ± 18.0          |
| Pre-bronchodilator FEV <sub>1</sub> / FVC (% predicted)    | 28  | 35.5 ± 9.0           |
| Post-bronchodilator FEV <sub>1</sub> / FVC (% predicted)   | 29  | 35.5 ± 10.0          |
| With fixed airflow obstruction – no. (%) <sup>a</sup>      | 29  | 28 (96.6)            |
| DLCO (%)                                                   | 25  | 41.4 ± 12.4          |
| <i>Symptoms</i>                                            |     |                      |
| With cough – no (%)                                        | 46  | 38 (82.6)            |
| With wheezing – no (%)                                     | 47  | 7 (14.9)             |
| With emphysema no. (%)                                     | 25  | 24 (96.0)            |
| Exacerbations in 12 months - no. (%) <sup>b</sup>          | 47  | 1.6 ± 0.7            |
| Hospitalizations for COPD in 12 months - no. <sup>b</sup>  | 17  | 0.7 ± 0.7            |

**S2 Table (continued)**

---

|                                          |    |           |
|------------------------------------------|----|-----------|
| <i>Comorbidities</i>                     |    |           |
| Cardiovascular – no. (%)                 | 47 | 22 (46.8) |
| Diabetes – no. (%)                       | 47 | 9 (19.1)  |
| Obstructive sleep apnea – no. (%)        | 47 | 1 (2.1)   |
| <i>Treatments</i>                        |    |           |
| On SABA – no. (%)                        | 47 | 44 (93.6) |
| On LABA – no. (%)                        | 43 | 42 (97.7) |
| On LAMA – no. (%)                        | 47 | 25 (53.0) |
| On ICS – no. (%)                         | 47 | 43 (91.5) |
| Daily dose of equivalents beclomethasone | 40 | 842 ± 366 |
| On OCS – no. (%)                         | 47 | 4 (8.5)   |
| Daily dose of prednisone (mg)            | 4  | 4.9 ± 2.3 |
| On oxygen therapy – no. (%)              | 47 | 27 (57.4) |
| Adherence to treatment – no. (%)         | 12 | 8 (66.7)  |

---

CRP = C reactive protein; FEV<sub>1</sub> = Forced Expiratory Volume in 1 second; FVC = Forced Vital Capacity; DLCO = transfer factor of the lung for carbon monoxide; SABA = short-acting β<sub>2</sub>-agonists; LABA = long-acting β<sub>2</sub>-agonists; LAMA = long-lasting muscarinic antagonists; ICS = inhaled corticosteroids = OCS, oral corticosteroids.

Data are n (%), or means ± SD, or median (25-75 IQR), or means ± SEM, for the number of exacerbations

\* denotes the number of patients with each available variable

<sup>b</sup> Estimated frequency of exacerbations and hospitalizations based on the events during the study period
