# Supplementary material for: Proteomic profiling of serum identifies a molecular signature that correlates with clinical outcomes in COPD
Source: PubMed Central journal article supplement (PMC9731494; doi:10.1371/journal.pone.0277357), 2022-12-08
Supplement: pone.0277357.s005.pdf [file pone.0277357.s005.pdf]

## Supporting information

**S4 Table: Significant correlations between differentially regulated proteins and the incidence of exacerbations and emphysema in patients with COPD at visit 1.**

| Biological Hallmarks             | Target                                | Exacerbations (Y/N) |                  | Emphysema (Y/N)  |        |
|----------------------------------|---------------------------------------|---------------------|------------------|------------------|--------|
|                                  |                                       | OR (2.5-97.5%)      | FDR              | OR (2.5-97.5%)   | FDR    |
| Cell fate, Remodeling and Repair | PRKCA <sup>a</sup>                    | 0.57 (0.41-0.79)    | 0.016            | -                | -      |
|                                  | PRKACA <sup>a</sup>                   | -                   | -                | 0.62 (0.41-0.90) | 0.0200 |
|                                  | SHC1                                  | -                   | -                | 0.33 (0.17-0.58) | 0.0026 |
|                                  | eIF-5A-1                              | -                   | -                | 0.43 (0.18-0.60) | 0.0026 |
|                                  | TCTP                                  | 0.57 (0.36-0.87)    | 0.0476           | 0.35 (0.20-0.58) | 0.0026 |
|                                  | PA2G4                                 | -                   | -                | 0.40 (0.24-0.64) | 0.0026 |
|                                  | <b>14-3-3 protein β/α<sup>a</sup></b> | 0.50 (0.30-0.79)    | 0.0281           | 0.41 (0.24-0.68) | 0.0032 |
|                                  | 14-3-3 protein ζ/δ <sup>a</sup>       | 0.45 (0.28-0.70)    | 0.0160           | 0.42 (0.26-0.68) | 0.0031 |
|                                  | BAD <sup>a</sup>                      | -                   | -                | 0.45 (0.27-0.70) | 0.0031 |
|                                  | RPS6KA3 <sup>a</sup>                  | 0.61 (0.40-0.89)    | 0.048            | 0.46 (0.29-0.71) | 0.0031 |
|                                  | <b>AREG</b>                           | -                   | -                | 0.46 (0.27-0.75) | 0.0065 |
|                                  | METAP1 <sup>a</sup>                   | -                   | -                | 0.50 (0.32-0.76) | 0.0044 |
|                                  | <b>FGF16</b>                          | -                   | -                | 0.52 (0.31-0.81) | 0.0115 |
|                                  | RAC1 <sup>a</sup>                     | 0.58 (0.40-0.82)    | 0.022            | 0.52 (0.35-0.76) | 0.0033 |
|                                  | SBDS                                  | 0.66 (0.48-0.92)    | 0.048            | 0.53 (0.36-0.76) | 0.0031 |
|                                  | hnRNP A2/B1                           | -                   | -                | 0.53 (0.36-0.79) | 0.0060 |
|                                  | NSF1C                                 | -                   | -                | 0.55 (0.39-0.77) | 0.0031 |
|                                  | PKC-A <sup>a</sup>                    | -                   | -                | 0.55 (0.38-0.78) | 0.0042 |
|                                  | SMAD2 <sup>a</sup>                    | 0.67 (0.49-0.92)    | 0.048            | 0.58 (0.40-0.81) | 0.0059 |
|                                  | <b>eIF-4H</b>                         | 0.63 (0.45-0.86)    | 0.028            | 0.59 (0.41-0.82) | 0.0061 |
|                                  | DRG-1                                 | -                   | -                | 0.51 (0.35-0.72) | 0.0026 |
|                                  | DLRB1                                 | -                   | -                | 0.61 (0.39-0.91) | 0.025  |
|                                  | PLPP                                  | -                   | -                | 0.36 (0.20-0.62) | 0.0026 |
|                                  | ARGI1                                 | 0.62 (0.43-0.88)    | 0.047            | -                | -      |
|                                  | IMB1 <sup>a</sup>                     | -                   | -                | 0.60 (0.43-0.80) | 0.003  |
|                                  | ARGI1 <sup>a</sup>                    | 0.62 (0.43-0.88)    | 0.047            | -                | -      |
|                                  | 41                                    | -                   | -                | 0.62 (0.44-0.86) | 0.010  |
|                                  | GRB2 adapter protein                  | 0.72 (0.55-0.93)    | 0.017            | 0.64 (0.49-0.85) | 0.004  |
|                                  | <b>Tropomyosin 4</b>                  | 0.78 (0.64-0.96)    | 0.024            | 0.71 (0.57-0.89) | 0.004  |
|                                  | Sphingosine kinase 1                  | 0.66 (0.47-0.91)    | 0.048            | 0.60 (0.41-0.85) | 0.008  |
|                                  | Hemoglobin                            | -                   | -                | 0.72 (0.54-0.93) | 0.027  |
|                                  | CSK                                   | -                   | -                | 0.64 (0.47-0.86) | 0.006  |
|                                  | FYN <sup>a</sup>                      | -                   | -                | 0.74 (0.56-0.97) | 0.042  |
|                                  | ERK-1 <sup>a</sup>                    | 0.50 (0.29-0.84)    | 0.0476           | 0.41 (0.22-0.72) | 0.0062 |
|                                  | MK01/ERK-2                            | -                   | -                | 0.45 (0.26-0.74) | 0.0061 |
|                                  | PKC-B-II                              | 0.59 (0.43-0.80)    | 0.0158           | 0.55 (0.40-0.76) | 0.0026 |
|                                  | Prostatic binding protein             | -                   | -                | 0.41 (0.24-0.68) | 0.0032 |
|                                  | Caspase-3                             | 0.66 (0.47-0.91)    | 0.048            | 0.52 (0.35-0.74) | 0.0030 |
|                                  | PDPK1 <sup>a</sup>                    | -                   | -                | 0.61 (0.43-0.87) | 0.011  |
|                                  | LYN <sup>a</sup>                      | 0.65 (0.47-0.87)    | 0.029            | 0.65 (0.47-0.89) | 0.013  |
| LYNB <sup>a</sup>                | 0.65 (0.48-0.87)                      | 0.028               | 0.68 (0.50-0.91) | 0.016            |        |
| CK2-A1:B                         | -                                     | -                   | 0.56 (0.40-0.80) | 0.0164           |        |
| NDP kinase B <sup>a</sup>        | -                                     | -                   | 0.52 (0.36-0.74) | 0.0026           |        |
| FER <sup>a</sup>                 | 0.71 (0.55-0.91)                      | 0.016               | 0.67 (0.51-0.87) | 0.004            |        |
| RAN <sup>a</sup>                 | -                                     | -                   | 0.60 (0.42-0.82) | 0.0063           |        |

**S4 Table (continued)**

|                                    |                                                              |                  |        |                  |        |
|------------------------------------|--------------------------------------------------------------|------------------|--------|------------------|--------|
| <b>Metabolism and Mitochondria</b> | RAC1                                                         | 0.58 (0.40-0.82) | 0.022  | 0.52 (0.35-0.76) | 0.0033 |
|                                    | $\alpha$ -Synuclein <sup>a</sup>                             | -                | -      | 0.53 (0.36-0.75) | 0.0031 |
|                                    | <b>Cyclophilin F</b>                                         | 0.72 (0.57-0.91) | 0.016  | 0.63 (0.50-0.84) | 0.003  |
|                                    | Cyclophilin A <sup>a</sup>                                   | 0.42 (0.24-0.73) | 0.0222 | 0.31 (0.16-0.57) | 0.0026 |
|                                    | SUMO3                                                        | -                | -      | 0.38 (0.21-0.63) | 0.0026 |
|                                    | UFM1                                                         | -                | -      | 0.48 (0.31-0.70) | 0.0026 |
|                                    | SNAA                                                         | -                | -      | 0.47 (0.31-0.69) | 0.0026 |
|                                    | VAV <sup>a</sup>                                             | 0.70 (0.53-0.90) | 0.040  | 0.66 (0.49-0.86) | 0.006  |
|                                    | <b>14-3-3 protein <math>\beta/\alpha</math> <sup>a</sup></b> | 0.50 (0.30-0.79) | 0.0281 | 0.41 (0.24-0.68) | 0.0032 |
|                                    | 14-3-3 protein $\zeta/\delta$ <sup>a</sup>                   | 0.45 (0.28-0.70) | 0.0160 | 0.42 (0.26-0.68) | 0.0031 |
|                                    | BAD                                                          | -                | -      | 0.45 (0.27-0.70) | 0.0031 |
|                                    | Triosephosphate isomerase                                    | -                | -      | 0.37 (0.21-0.61) | 0.0026 |
|                                    | RPS6KA3                                                      | 0.61 (0.40-0.89) | 0.048  | 0.46 (0.29-0.71) | 0.0031 |
|                                    | METAP1                                                       | -                | -      | 0.50 (0.32-0.76) | 0.0044 |
|                                    | Ubiquitin+1 <sup>a</sup>                                     | -                | -      | 0.37 (0.10-0.66) | 0.0045 |
|                                    | UBC9                                                         | -                | -      | 0.38 (0.21-0.67) | 0.0026 |
|                                    | UBE2N <sup>a</sup>                                           | -                | -      | 0.46 (0.31-0.68) | 0.0026 |
|                                    | <b>Carbonic anhydrase XIII</b>                               | 0.80 (0.65-0.99) | 0.038  | 0.74 (0.59-0.94) | 0.011  |
|                                    | SRCN1                                                        | 0.64 (0.49-0.83) | 0.016  | 0.75 (0.57-0.97) | 0.035  |
|                                    | M2-PK                                                        | 0.55 (0.39-0.77) | 0.016  | 0.72 (0.53-0.98) | 0.045  |
|                                    | PPAC                                                         | -                | -      | 0.64 (0.47-0.85) | 0.006  |
|                                    | Transketolase                                                | -                | -      | 0.38 (0.22-0.63) | 0.0026 |
|                                    | Aflatoxin B1 aldehyde reductase                              | -                | -      | 0.61 (0.43-0.84) | 0.007  |
|                                    | NCC27                                                        | -                | -      | 0.46 (0.25-0.80) | 0.0129 |
|                                    | PPID                                                         | 0.60 (0.43-0.81) | 0.016  | 0.70 (0.51-0.95) | 0.033  |
|                                    | Myokinase                                                    | -                | -      | 0.64 (0.48-0.85) | 0.006  |
|                                    | NACA                                                         | -                | -      | 0.53 (0.35-0.79) | 0.0061 |
|                                    | SGTA                                                         | -                | -      | 0.64 (0.46-0.88) | 0.013  |
|                                    | <b>H2A3</b>                                                  | 0.87 (0.69-1.09) | 0.2495 | 0.81 (0.63-1.04) | 0.014  |
|                                    | <b>BTK</b> <sup>a</sup>                                      | 0.72 (0.57-0.92) | 0.016  | 0.63 (0.49-0.82) | 0.003  |
|                                    | RPS6KA3                                                      | 0.61 (0.40-0.89) | 0.048  | 0.46 (0.29-0.71) | 0.0031 |
|                                    | DUS3                                                         | -                | -      | 0.50 (0.30-0.78) | 0.0072 |
|                                    | RAC1 <sup>a</sup>                                            | 0.58 (0.40-0.82) | 0.022  | 0.52 (0.35-0.76) | 0.0033 |
|                                    | <b>CD40 ligand</b>                                           | -                | -      | 0.54 (0.35-0.81) | 0.0074 |
|                                    | CPNE1 <sup>a</sup>                                           | 0.56 (0.35-0.88) | 0.048  | 0.51 (0.30-0.83) | 0.0142 |
|                                    | IMB1                                                         | -                | -      | 0.60 (0.43-0.80) | 0.003  |
|                                    | PTP-1C                                                       | -                | -      | 0.63 (0.42-0.91) | 0.023  |
|                                    | SRCN1                                                        | 0.64 (0.49-0.83) | 0.016  | 0.75 (0.57-0.97) | 0.035  |
|                                    | Annexin I                                                    | -                | -      | 0.59 (0.39-0.88) | 0.0164 |
|                                    | BARK1                                                        | -                | -      | 0.62 (0.41-0.92) | 0.026  |
|                                    | GAPDH                                                        | 0.64 (0.47-0.84) | 0.022  | 0.59 (0.44-0.78) | 0.003  |
|                                    | SP-D                                                         | -                | -      | 0.76 (0.59-0.97) | 0.034  |
|                                    | STAT3                                                        | 0.47 (0.26-0.83) | 0.0476 | 0.38 (0.20-0.71) | 0.0026 |
|                                    | 6-Phosphogluconate dehydrogenase                             | 0.68 (0.53-0.85) | 0.016  | -                | -      |
|                                    | ARG11                                                        | 0.62 (0.43-0.88) | 0.047  | -                | -      |
|                                    | <b>Midkine</b>                                               | -                | -      | 1.5 (1.1-2.0)    | 0.014  |
|                                    | <b>Lactadherin (MFGM)</b>                                    | -                | -      | 1.9 (1.3-2.9)    | 0.006  |
| <b>Tissue injury</b>               | <b>MMP-12</b>                                                | -                | -      | 1.51 (1.07-2.15) | 0.027  |
|                                    | <b>Renin</b>                                                 | -                | -      | 1.88 (1.26-2.87) | 0.006  |

<sup>a</sup> These proteins have multiples biological functions and, therefore, they belong to more than one biological process

Bold indicates the 15 proteins belonging to the short signature
