# Supplementary material for: Proteomic profiling of serum identifies a molecular signature that correlates with clinical outcomes in COPD
Source: PubMed Central journal article supplement (PMC9731494; doi:10.1371/journal.pone.0277357), 2022-12-08
Supplement: pone.0277357.s006.pdf [file pone.0277357.s006.pdf]

## Supporting information

**S5 Table. Differences in clinical characteristics COPD patients from the MLCC cohort between Cluster 1 and Cluster 2 at inclusion**

| Parameter                                                  | Cluster 1<br>(n=34) | Cluster 2<br>(n=13) | p value * |
|------------------------------------------------------------|---------------------|---------------------|-----------|
| Male sex – no. (%)                                         | 19 (55.9)           | 10 (76.9)           | 0.32      |
| Age (years)                                                | 73.4 ± 9.3          | 70.4 ± 10.4         | 0.35      |
| Caucasian origin – no. (%)                                 | 34 (100)            | 13 (100)            | -         |
| Other origin – no. (%)                                     | 0                   | 0                   | -         |
| <i>GOLD stages</i>                                         |                     |                     |           |
| GOLD 1 – no. (%)                                           | 2 (5.9)             | 0 (0.0)             | 0.80      |
| GOLD 2 – no. (%)                                           | 12 (35.3)           | 4 (30.8)            | 0.80      |
| GOLD 3 – no. (%)                                           | 13 (38.2)           | 6 (46.2)            | 0.80      |
| GOLD 4 – no. (%)                                           | 7 (20.6)            | 3 (23.1)            | 0.80      |
| <i>Smoking history</i>                                     |                     |                     |           |
| Never smokers – no. (%)                                    | 0                   | 0                   | -         |
| Former smoker – no. (%)                                    | 32 (94.1)           | 9 (69.2)            | 0.07      |
| Packs per year in former smokers – no.                     | 59.5 ± 35.0         | 47.7 ± 21.0         | 0.34      |
| Active smokers – no. (%)                                   | 2 (5.9)             | 4 (30.8)            | 0.07      |
| Packs per year in active smokers – no.                     | 132.5 ± 10.6        | 67.5 ± 51.1         | 0.17      |
| Body Mass Index (kg per m <sup>2</sup> )                   | 25.7 ± 5.1          | 23.4 ± 5.6)         | 0.30      |
| <i>Biology</i>                                             |                     |                     |           |
| Blood leukocytes (no. per mm <sup>3</sup> )                | 7700 (6400-9500)    | 8200 (7375-9800)    | 0.40      |
| Blood eosinophils (no. per mm <sup>3</sup> )               | 200 (100-300)       | 100 (75-200)        | 0.14      |
| With blood eosinophils ≥ 300 per mm <sup>3</sup> – no. (%) | 12 (36.4)           | 2 (6.7)             | 0.37      |
| Blood neutrophils (no. per mm <sup>3</sup> )               | 5000 (4100-6400)    | 5350 (4975- 6350)   | 0.29      |
| Blood lymphocytes (no. per mm <sup>3</sup> )               | 1500 (1100-2200)    | 1650 (1475-1925)    | 0.55      |
| Blood monocytes (no. per mm <sup>3</sup> )                 | 700 (500-800)       | 700 (675-1000)      | 0.24      |
| Hemoglobin – g per deciliter                               | 12.9 (1.7)          | 13.5 (1.5)          | 0.32      |
| CRP – mg per Liter                                         | 1.5 (3.4)           | 1.1 (1.0)           | 0.73      |
| With CRP ≥ 3 mg per Liter – no. (%)                        | 2 (8.3)             | 0 (0.0)             | 0.89      |
| <i>Respiratory function</i>                                |                     |                     |           |
| Pre-bronchodilator FEV <sub>1</sub> (% predicted)          | 44.6 (15.8)         | 33.0 (12.0)         | 0.11      |
| Post-bronchodilator FEV <sub>1</sub> (% predicted)         | 45.9 (16.4)         | 35.5 (12.6)         | 0.17      |
| Pre-bronchodilator FVC (% predicted)                       | 90.5 (16.2)         | 84.5 (24.8)         | 0.49      |
| Post-bronchodilator FVC (% predicted)                      | 95.3 (20.5)         | 87.7 (22.1)         | 0.44      |
| Pre-bronchodilator FEV <sub>1</sub> / FVC (% predicted)    | 38.2 (9.9)          | 30.0 (4.4)          | 0.06      |
| Post-bronchodilator FEV <sub>1</sub> / FVC (% predicted)   | 37.8 (10.2)         | 30.8 (5.0)          | 0.13      |
| DLCO (%)                                                   | 47.3 (13.6)         | 37.2 (5.9)          | 0.13      |

**S5 Table (continued)**

---

|                                          |               |               |              |
|------------------------------------------|---------------|---------------|--------------|
| <i>Symptoms</i>                          |               |               |              |
| With cough – no (%)                      | 28 (82.4)     | 10 (83.3)     | 1.00         |
| With wheezing – no (%)                   | 3 (8.8)       | 4 (30.8)      | 0.15         |
| With emphysema no. (%)                   | 30 (88.9)     | 5 (38.5)      | <b>0.001</b> |
| <i>Comorbidities</i>                     |               |               |              |
| Cardiovascular – no. (%)                 | 18 (52.9)     | 4 (30.8)      | 0.20         |
| Diabetes – no. (%)                       | 8 (23.5)      | 1 (7.7)       | 0.11         |
| <i>Treatments</i>                        |               |               |              |
| On SABA – no. (%)                        | 32 (94.1)     | 12 (92.3)     | 1.00         |
| On LABA – no. (%)                        | 32 (94.1)     | 9 (69.3)      | <b>0.04</b>  |
| On LAMA – no. (%)                        | 32 (100.0)    | 10 (90.9)     | 0.57         |
| On ICS – no. (%)                         | 32 (94.1)     | 11 (84.6)     | 0.65         |
| Daily dose of equivalents beclomethasone | 864.1 ± 382.3 | 752.5 ± 298.2 | 0.45         |
| On oxygen therapy – no. (%)              | 21 (61.8)     | 6 (46.2)      | 0.52         |

---

Data are n (%), or means ± SD, or median (25-75 interquartile range), or means ± SEM, for the number of exacerbations

CRP = C reactive protein; FEV<sub>1</sub> = Forced Expiratory Volume in 1 second; FVC = Forced Vital Capacity; DLCO = transfer factor of the lung for carbon monoxide; SABA = short-acting β<sub>2</sub>-agonists; LABA = long-acting β<sub>2</sub>-agonists; LAMA = long-lasting muscarinic antagonists; ICS = inhaled corticosteroids.

\* Students' t test, or Fisher exact test 2-tailed, or Mann-Whitney U-test

<sup>a</sup> Estimated frequency of exacerbations and hospitalizations, according to the events during the study period
