# Supplementary material for: Proteomic profiling of serum identifies a molecular signature that correlates with clinical outcomes in COPD
Source: PubMed Central journal article supplement (PMC9731494; doi:10.1371/journal.pone.0277357), 2022-12-08
Supplement: pone.0277357.s007.pdf [file pone.0277357.s007.pdf]

## Supporting information

**S6 Table. Main clinical characteristics of COPD patients switching of Clusters between visit 1 and visit 2**

| Parameter                                                                                 | Values at visit 1 | Values at visit 2 | p value *   |
|-------------------------------------------------------------------------------------------|-------------------|-------------------|-------------|
| <b>COPD patients switching from Cluster 1 at visit 1 to Cluster 2 at visit 2 (n = 29)</b> |                   |                   |             |
| With emphysema - no. (%) <sup>b</sup>                                                     | 16 (55.2)         | 13 (44.8)         | 0.44        |
| DLCO - %                                                                                  | 49.4 ± 13.3       | 54.3 ± 28.5       | 0.60        |
| With exacerbations in the previous 12 months - no. (%)                                    | 20 (69.0)         | 11 (37.9)         | <b>0.02</b> |
| With unscheduled medical visits in the previous 12 months - no. (%)                       | 16 (55.2)         | 8 (27.6)          | <b>0.04</b> |
| With hospitalizations for COPD in the previous 12 months – no. (%)                        | 8 (27.6)          | 1 (3.4)           | <b>0.02</b> |
| On SABA – no. (%)                                                                         | 19 (65.5)         | 18 (69.2)         | 1.00        |
| On LABA – no. (%)                                                                         | 22 (75.9)         | 20 (70)           | 0.77        |
| On LAMA – no. (%)                                                                         | 19 (65.5)         | 20 (70)           | 1.00        |
| On ICS – no. (%)                                                                          | 13 (44.8)         | 15 (51.7)         | 0.79        |
| On anti-hypertensive drugs – no. (%)                                                      | 12 (41.4)         | 10 (38.5)         | 0.79        |
| On statins – no. (%)                                                                      | 11 (37.9)         | 10 (38.5)         | 1.00        |
| Adherence to treatment – no. (%)                                                          | 26 (89.7)         | 26 (89.7)         | 1.00        |
| <b>COPD patients switching from Cluster 2 at visit 1 to Cluster 1 at visit 2 (n = 26)</b> |                   |                   |             |
| With emphysema - no. (%)                                                                  | 5 (19.2)          | 11 (42.3)         | 0.08        |
| DLCO - %                                                                                  | 53.6 ± 18.0       | 53.4 ± 10.9       | 0.99        |
| With exacerbations in the previous 12 months - no. (%)                                    | 15 (57.7)         | 10 (38.5)         | 0.17        |
| With unscheduled medical visits in the previous 12 months - no. (%)                       | 10 (38.5)         | 8 (30.8)          | 0.56        |
| With hospitalizations for COPD in the previous 12 months – no. (%)                        | 1 (4)             | 6 (23.1)          | <b>0.05</b> |
| On SABA – no. (%)                                                                         | 20 (69)           | 19 (73.1)         | 1.00        |
| On LABA – no. (%)                                                                         | 18 (62.1)         | 21 (80.8)         | 0.52        |
| On LAMA – no. (%)                                                                         | 12 (46.2)         | 20 (76.9)         | <b>0.04</b> |
| On ICS – no. (%)                                                                          | 13 (50)           | 15 (57.7)         | 0.74        |
| On anti-hypertensive drugs – no. (%)                                                      | 7 (24.1)          | 8 (30.8)          | 1.00        |
| On statins – no. (%)                                                                      | 2 (6.9)           | 3 (11.5)          | 1.00        |
| Adherence to treatments - no. (%)                                                         | 23 (92.0)         | 24 (100.0)        | 1.00        |

Data are expressed as numbers (%) and as means ± SD

DLCO = transfer factor of the lung for carbon monoxide; SABA = short-acting β<sub>2</sub>-agonists; LABA = long-acting β<sub>2</sub>-agonists; LAMA = long-lasting muscarinic antagonists; ICS = inhaled corticosteroids.

\* Students' t test or Fisher exact test 2-tailed
